# Supplementary material for: A telomere-to-telomere pangenome reveals structural variations as key drivers of complex traits in chickens
Source: Research Square preprint supplement (doi:10.21203/rs.3.rs-7302767/v1), 2025-08-12
Supplement: Supplementary file 1 [file 544f2c64edb050938a67d4c1.xlsx]

## Sheet: Table S01
Supplementary table 1. Statistics of PacBio Revio sequencing data
ID	Samples	num_seqs	sum_len(bp)	N50_len(bp)
Red Junglefowl	FZTD220016099-2A	2324358	43265468161	19270
	FZTD220016099-2A	2060292	35103225122	16948
Beijing-You	FZTD220015172-2A	1994500	41978167487	21186
	FZTD220015172-2A	1710334	35543154758	20868
Tibetan	FZTD230002301-1A	2018152	38823523294	19365
	FZTD230002301-1A	2051354	38841080481	19002
Disease-resistant strain	FZTD230001807-2A	2276242	37721261611	16662
	FZTD230001807-2A	1759580	29598650940	16940
Houdan	FZTD230004159-2A	1795415	33593665261	18918
	FZTD230004159-2A	2168243	40750336075	19000
Cornish	FZTD220016106-2A	2344188	39553206483	17334
	FZTD220016106-2A	2183230	34944572899	16249
White Plymouth Rock	FZTD220016112-2A	1943152	31855019920	16896
	FZTD220016112-2A	1967153	31562361628	16478
White Leghorn	FZTD230001837-2A	2062619	38179728335	18626
	FZTD230001837-2A	2045712	37979812859	18695

## Sheet: Table S02
Supplementary table 2. Statistics of ONT ultra-long sequencing data
ID	num_seqs	sum_len(bp)	N50_len(bp)
Red Junglefowl	4186888	77703167032	70595
Beijing-You	3302985	83262806050	61142
Tibetan	7901873	146356783411	47624
Disease-resistant strain	4126584	79403965132	55326
Houdan	4029099	99373106567	65584
Cornish	3687614	80211230603	51194
White Plymouth Rock	4011330	73729631255	58130
White Leghorn	3576264	86680417968	61077

## Sheet: Table S03
Supplementary table 3. Statistics of Hi-C sequencing data
ID	file	num_seqs	sum_len(bp)	N50
Red Junglefowl	FDHC220016100-1a_L1_1.fq.gz	13415887	2012383050	150
	FDHC220016100-1a_L1_2.fq.gz	13415887	2012383050	150
	FDHC220016100-1a_L2_1.fq.gz	551840664	82776099600	150
	FDHC220016100-1a_L2_2.fq.gz	551840664	82776099600	150
Beijing-You	FDHC220002761-1a_L1_1.fq.gz	6604343	990651450	150
	FDHC220002761-1a_L1_2.fq.gz	6604343	990651450	150
	FDHC220002761-1a_L2_1.fq.gz	119072945	17860941750	150
	FDHC220002761-1a_L2_2.fq.gz	119072945	17860941750	150
	FDHC220002761-1a_L3_1.fq.gz	120897141	18134571150	150
	FDHC220002761-1a_L3_2.fq.gz	120897141	18134571150	150
	FDHC220002761-1a_L4_1.fq.gz	172928370	25939255500	150
	FDHC220002761-1a_L4_2.fq.gz	172928370	25939255500	150
Tibetan	FDHC230002303-1a_L1_1.fq.gz	6645579	996836850	150
	FDHC230002303-1a_L1_2.fq.gz	6645579	996836850	150
	FDHC230002303-1a_L2_1.fq.gz	350182301	52527345150	150
	FDHC230002303-1a_L2_2.fq.gz	350182301	52527345150	150
	FDHC230002303-1a_L3_1.fq.gz	18146571	2721985650	150
	FDHC230002303-1a_L3_2.fq.gz	18146571	2721985650	150
Disease-resistant strain	FDHC230001809-1a_L1_1.fq.gz	9393213	1408981950	150
	FDHC230001809-1a_L1_2.fq.gz	9393213	1408981950	150
	FDHC230001809-1a_L2_1.fq.gz	430375822	64556373300	150
	FDHC230001809-1a_L2_2.fq.gz	430375822	64556373300	150
Houdan	FDHC230004160-1a_L1_1.fq.gz	6858389	1028758350	150
	FDHC230004160-1a_L1_2.fq.gz	6858389	1028758350	150
	FDHC230004160-1a_L2_1.fq.gz	133797488	20069623200	150
	FDHC230004160-1a_L2_2.fq.gz	133797488	20069623200	150
	FDHC230004160-1a_L3_1.fq.gz	141723628	21258544200	150
	FDHC230004160-1a_L3_2.fq.gz	141723628	21258544200	150
	FDHC230004160-1a_L4_1.fq.gz	169022524	25353378600	150
	FDHC230004160-1a_L4_2.fq.gz	169022524	25353378600	150
Cornish	FDHC220016107-1a_L1_1.fq.gz	12994384	1949157600	150
	FDHC220016107-1a_L1_2.fq.gz	12994384	1949157600	150
	FDHC220016107-1a_L2_1.fq.gz	494615400	74192310000	150
	FDHC220016107-1a_L2_2.fq.gz	494615400	74192310000	150
White Plymouth Rock	FDHC220016113-1a_L1_1.fq.gz	7729512	1159426800	150
	FDHC220016113-1a_L1_2.fq.gz	7729512	1159426800	150
	FDHC220016113-1a_L2_1.fq.gz	496510581	74476587150	150
	FDHC220016113-1a_L2_2.fq.gz	496510581	74476587150	150
White Leghorn	FDHC230001839-1a_L1_1.fq.gz	8020716	1203107400	150
	FDHC230001839-1a_L1_2.fq.gz	8020716	1203107400	150
	FDHC230001839-1a_L2_1.fq.gz	408191881	61228782150	150
	FDHC230001839-1a_L2_2.fq.gz	408191881	61228782150	150

## Sheet: Table S04
Supplementary table 4.Summary of different versions of the assemblies.
ID	Assembly	Dataset	Total length (bp)	Total number	Max length (bp)	N50 length (bp)	N50 number
Red Junglefowl	hifiasm	Nanopore+HiFi+HIC	1133219224	206	198565250	59818361	5
	verkko(hap1)	Nanopore+HiFi+HIC	1031351219	96	89870904	33949920	10
	verkko(hap2)	Nanopore+HiFi+HIC	951664070	100	104805298	42743582	7
	NextDenovo2	Nanopore	1107689874	134	180880640	52469570	6
Beijing-You	hifiasm	Nanopore+HiFi+HIC	1135119962	162	116713237	59643147	7
	verkko(hap1)	Nanopore+HiFi+HIC	984091777	140	112351325	62121637	6
	verkko(hap2)	Nanopore+HiFi+HIC	1010233494	107	114564700	44191391	7
	NextDenovo2	Nanopore	1101054218	114	143161787	47663194	7
Tibetan	hifiasm	Nanopore+HiFi+HIC	1139025286	189	152575526	77330135	6
	verkko(hap1)	Nanopore+HiFi+HIC	932898001	109	63231560	18831985	15
	verkko(hap2)	Nanopore+HiFi+HIC	938359375	133	86482828	18821741	16
	NextDenovo2	Nanopore	1109142184	122	126102704	66873426	7
Disease-resistant strain	hifiasm	Nanopore+HiFi+HIC	1144100631	249	148728670	59877233	6
	verkko(hap1)	Nanopore+HiFi+HIC	1022796513	228	114213553	38169155	9
	verkko(hap2)	Nanopore+HiFi+HIC	946049810	82	113212392	36348964	8
	NextDenovo2	Nanopore	1109422051	131	150638852	61385063	6
Houdan	hifiasm	Nanopore+HiFi+HIC	1133706380	293	148889001	59645616	6
	verkko(hap1)	Nanopore+HiFi+HIC	944219066	84	74913792	45863978	8
	verkko(hap2)	Nanopore+HiFi+HIC	961107930	158	148647492	41338567	6
	NextDenovo2	Nanopore	1120257844	124	178574225	59662676	6
Cornish	hifiasm	Nanopore+HiFi+HIC	1128083112	193	150898837	69244102	6
	verkko(hap1)	Nanopore+HiFi+HIC	973578888	225	108889211	40977764	8
	verkko(hap2)	Nanopore+HiFi+HIC	958424916	98	79317837	37716086	8
	NextDenovo2	Nanopore	1096527134	122	105196157	55502929	8
White Plymouth Rock	hifiasm	Nanopore+HiFi+HIC	1129386902	193	149566028	59638930	6
	verkko(hap1)	Nanopore+HiFi+HIC	944980862	145	104478004	32159482	10
	verkko(hap2)	Nanopore+HiFi+HIC	1020990346	215	71153627	31859475	12
	NextDenovo2	Nanopore	1083970034	104	105450890	59616851	7
White Leghorn	hifiasm	Nanopore+HiFi+HIC	1159316762	309	91111146	47343595	10
	verkko(hap1)	Nanopore+HiFi+HIC	914169200	151	108518528	54568439	6
	verkko(hap2)	Nanopore+HiFi+HIC	952364170	269	112753945	29051124	9
	NextDenovo2	Nanopore	1100526907	115	106213822	52570719	7

## Sheet: Table S05
Supplementary table 5.Assessment the gene coverage rate using BUSCO
Assemblies	BUSCO notation assessment results
Red Junglefowl	C:99.2%[S:99.0%,D:0.1%],F:0.1%,M:0.7%,n:8338
Beijing-You	C:99.2%[S:99.0%,D:0.2%],F:0.1%,M:0.7%,n:8338
Tibetan	C:99.2%[S:99.0%,D:0.1%],F:0.1%,M:0.7%,n:8338
Disease-resistant strain	C:99.2%[S:99.0%,D:0.2%],F:0.1%,M:0.7%,n:8338
Houdan	C:99.2%[S:98.9%,D:0.2%],F:0.1%,M:0.8%,n:8338
Cornish	C:99.2%[S:99.0%,D:0.2%],F:0.1%,M:0.7%,n:8338
White Plymouth Rock	C:99.2%[S:99.0%,D:0.2%],F:0.1%,M:0.7%,n:8338
White Leghorn	C:99.2%[S:99.0%,D:0.2%],F:0.1%,M:0.7%,n:8338
GGswu	C:99.2%[S:99.0%,D:0.2%],F:0.1%,M:0.7%,n:8338
bGalGal4	C:99.1%[S:98.9%,D:0.3%],F:0.1%,M:0.8%,n:8338
bGalGal5	C:99.1%[S:98.9%,D:0.2%],F:0.1%,M:0.8%,n:8338
GRCg7b	C:99.2%[S:99.0%,D:0.2%],F:0.1%,M:0.7%,n:8338
GRCg7w	C:99.2%[S:99.0%,D:0.2%],F:0.1%,M:0.7%,n:8338
Note: Complete(C) and Single-Copy(S), Complete(C) and Duplicated(D),Fragmented(F),Missing(M),Total(n)

## Sheet: Table S06
Supplementary table 6. Statistic of genome quality of the 8 T2T genomes.
ID	Mapping rates(%)	QV	Error rate	Completeness(%)
Red Junglefowl	99.91	40.1582	9.64226e-05	92.1092
Beijing-You	99.55	39.2684	0.000118347	93.2474
Tibetan	99.89	39.9042	0.000102231	92.1418
Disease-resistant strain	99.88	39.7151	0.000106779	93.2264
Houdan	99.87	39.4992	0.000112222	94.4499
Cornish	99.93	37.4952	0.000178025	93.374
White Plymouth Rock	99.96	37.1465	0.000192907	95.3706
White Leghorn	99.91	38.8778	0.000129485	95.048

## Sheet: Table S07
Supplementary table 7. Statistics of telomere conditions at both ends of each chromosome in the T2T genome.
	Telomere numbers	Telomere ends	chr1	chr2	chr3	chr4	chr5	ch6	chr7	chr8	chr9	chr10	chr11	chr12	chr13	chr14	chr15	chr16	chr17	chr18	chr19	chr20	chr21	chr22	chr23	chr24	chr25	chr26	chr27	chr28	chr29	chr30	chr31	chr32	chr33	chr34	chr35	chr36	chr37	chr38	chrW	chrZ
Red Junglefowl	62	Left	1	1	1	1	1	1	1	1	0	1	1	1	1	1	1	0	1	1	1	1	1	1	1	1	1	1	1	0	1	0	1	1	1	0	0	1	0	0	0	0
		Right	1	1	0	1	1	1	1	1	0	1	1	1	1	1	1	0	1	1	1	1	1	1	1	1	1	1	1	1	1	0	0	1	1	1	0	0	1	1	0	1
Beijing-You	66	Left	1	1	1	1	1	1	1	1	1	1	1	1	1	1	1	1	1	1	1	1	1	1	1	1	1	1	1	1	0	1	0	1	1	0	0	0	1	0	0	0
		Right	1	1	1	1	1	1	1	1	1	1	1	1	1	1	1	0	1	1	1	1	1	1	1	1	0	1	1	1	1	1	1	0	1	0	1	1	0	1	0	1
Tibetan	66	Left	1	1	1	1	1	1	1	1	1	1	1	1	1	1	1	1	1	1	1	1	1	1	1	1	1	1	1	1	0	0	0	1	1	0	0	0	1	1	0	1
		Right	1	1	1	1	1	1	1	1	1	1	1	1	1	1	1	0	1	1	1	1	1	1	1	1	1	1	1	1	1	0	1	0	1	0	1	0	0	1	0	1
Disease-resistant strain	71	Left	1	1	1	1	1	1	1	1	1	1	1	1	1	1	1	1	1	1	1	1	1	1	1	1	1	1	1	1	1	1	1	1	1	1	1	0	1	0	0	0
		Right	1	1	1	1	1	1	1	1	1	1	1	1	1	1	1	0	1	1	1	1	1	1	1	1	1	1	1	1	1	1	1	0	1	1	1	0	0	1	0	1
Houdan	68	Left	1	1	1	1	1	1	1	1	1	1	1	1	1	1	1	1	1	1	1	1	1	1	1	1	1	1	1	1	0	0	0	1	1	0	1	0	1	0	0	0
		Right	1	1	1	1	1	1	1	1	1	1	1	1	1	1	1	1	1	1	1	1	1	1	1	1	1	1	1	1	1	1	1	0	1	1	1	0	0	1	0	1
Cornish	67	Left	1	1	1	1	1	1	1	1	1	1	1	1	1	1	1	1	1	1	1	1	1	1	1	1	1	1	1	1	0	1	0	1	1	1	0	0	0	0	0	0
		Right	1	1	1	1	1	1	1	1	1	1	1	1	1	1	1	0	1	1	1	1	1	1	1	1	1	1	1	1	1	1	1	0	1	0	1	1	0	1	0	1
White Plymouth Rock	68	Left	1	1	1	1	1	1	1	1	1	1	1	1	1	1	1	1	1	1	1	1	1	1	1	1	1	1	1	1	1	0	0	1	1	0	0	0	1	0	0	1
		Right	1	1	1	1	1	1	1	1	1	1	1	1	1	1	1	1	1	1	1	1	1	1	1	1	1	1	1	1	0	0	1	0	1	1	1	1	0	1	0	1
White Leghorn	69	Left	1	1	1	1	1	1	1	1	1	1	1	1	1	1	1	1	1	1	1	1	1	1	1	1	1	1	1	1	0	0	0	1	1	0	1	0	1	1	0	1
		Right	1	1	1	1	1	1	1	1	1	1	1	1	1	1	1	1	1	1	1	1	1	1	1	1	1	1	1	1	1	1	1	0	1	1	1	0	0	0	0	1
GGswu	58	Left	1	1	1	1	1	0	1	1	1	1	1	1	1	1	1	0	1	1	1	1	1	1	1	1	1	1	1	0	1	1	1	1	1	0	1	0	0	1	0	0
		Right	1	1	1	1	1	1	1	1	1	1	1	1	1	0	0	1	1	1	1	1	0	0	1	1	0	0	1	1	1	0	1	0	1	0	0	0	0	0	0	1

## Sheet: Table S08
Supplementary table 8.General statistics of predicted protein-coding genes
Gene set	Number of genes	CDS+intron len(avg)	CDS len(avg)	exon len(avg)	intron len(avg)	Exons per gene(avg)
Red Junglefowl	17602	20046.4	1606.01	169.32	2173.31	9.48
Beijing-You	17779	20163.6	1594.23	169.6	2210.61	9.4
Tibetan	17930	19914	1583.91	169.12	2191.15	9.37
Disease-resistant strain	17809	20046	1591.88	168.62	2186.38	9.44
Houdan	17774	20041.7	1600.16	169.01	2177.88	9.47
Cornish	17823	20052.1	1598.59	169.35	2186.54	9.44
White Plymouth Rock	17773	19890.3	1598.87	168.68	2157.3	9.48
White Leghorn	17664	20148.2	1606.72	169.02	2179.79	9.51

## Sheet: Table S09
Supplementary table 9. Genome PURs and genes in PURs of newly assembled T2T genome compared with existing chromosome-level assemblies.
Newly assembled T2T genome	Existing chromosome-level assemblies from NCBI	PURs in macro	PURs in micro	PURs in dot	Total PURs	Genes in macro PURs	Genes in micro PURs	Genes in dot PURs	Genes in total PURs
Red Junglefowl	GRCg6a	16984954	20177440	27404014	64566408	144	312	360	816
Tibetan	ASM2537063v1	29932521	23371355	27403044	80706920	219	420	371	1010
Houdan	ASM2465304v1	32249304	23493143	28185378	83927825	280	399	355	1034
Cornish	GRCg7b	11030599	12520018	16286218	39836835	94	190	242	526
White Plymouth Rock	GRCg7b	10838459	13046101	19514656	43399216	142	224	269	635
White Leghorn	GRCg7w	10011402	13554804	15666175	39232381	114	183	272	569

## Sheet: Table S10
Supplementary table 10.Statistics of various types of transposon annotations in 13 genomes.
ID	Retroelements	SINEs	LINEs	LTR elements	DNA transposons	Unclassified	TE (%)
Red Junglefowl	12.8	0.25	10.02	2.54	1.99	2.5	17.29
Beijing-You	12.79	0.25	9.94	2.6	2.04	2.81	17.65
Tibetan	12.72	0.25	9.9	2.58	2.1	2.78	17.42
Disease-resistant strain	12.72	0.25	9.91	2.56	2.03	2.67	17.6
Houdan	12.73	0.25	9.89	2.58	1.88	2.9	17.5
Cornish	12.89	0.25	10.02	2.62	1.91	2.78	17.58
White Plymouth Rock	12.65	0.25	9.83	2.58	2.07	2.73	17.45
White Leghorn	12.62	0.25	9.85	2.52	2.21	2.66	17.5
GGswu	13.21	0.25	10.05	2.91	2.04	2.8	18.03
bGalGal4	13.18	0.26	10.22	2.69	1.79	2.25	17.06
bGalGal5	12.69	0.25	9.82	2.62	2.06	2.31	17.51
GRCg7b	13.12	0.26	10.12	2.75	1.85	2.3	17.06
GRCg7w	13.18	0.26	10.22	2.69	1.79	2.25	17.21

[truncated: 12 more sheets: Table S11, Table S12, Table S13, Table S14, Table S15, Table S16, Table S17, Table S18, Table S19, Table S20, Table S21, Table S22]
